# Supplementary material for: Synthesis of NiGa2O4 ultra-thin nanosheets for improved xylene sensing properties and selectivity
Source: Royal Society of Chemistry journal article supplement (doi:10.1039/d3nj00338h), 2023-01-01
Supplement: d3nj00338h1.pdf [file d3nj00338h1.pdf]

# Supporting Information

## Synthesis of NiGa<sub>2</sub>O<sub>4</sub> ultra-thin nanosheets for improved xylene sensing properties and selectivity

Xinhua Tian<sup>#a</sup>, Jiayu Li<sup>#a</sup>, Qiuju Li<sup>\*b</sup>, Mingcheng Zhang<sup>a</sup>, Xiaoxin Zou<sup>a</sup>, Jiaqi Jia<sup>c</sup> and Guo-Dong Li<sup>\*a</sup>

<sup>a</sup> State Key Laboratory of Inorganic Synthesis and Preparative Chemistry, College of Chemistry, Jilin University, Changchun 130012, P. R. China.

<sup>b</sup> Department of Chemistry, College of Basic Medicine, Third Military Medical University (Army Medical University), Chongqing 400038, P. R. China.

<sup>c</sup> Vehicle Testing Engineering Research Institute of China, Beijing 102100, P. R. China

\*Corresponding Author:

State Key Laboratory of Inorganic Synthesis and Preparative Chemistry, College of Chemistry, Jilin University, Changchun 130012, P. R. China

**E-mail address:** [lgd@jlu.edu.cn](mailto:lgd@jlu.edu.cn)

Department of Chemistry, College of Basic Medicine, Third Military Medical University (Army Medical University), Chongqing 400038, P. R. China.

**E-mail address:** [liqiuju93@tmmu.edu.cn](mailto:liqiuju93@tmmu.edu.cn)

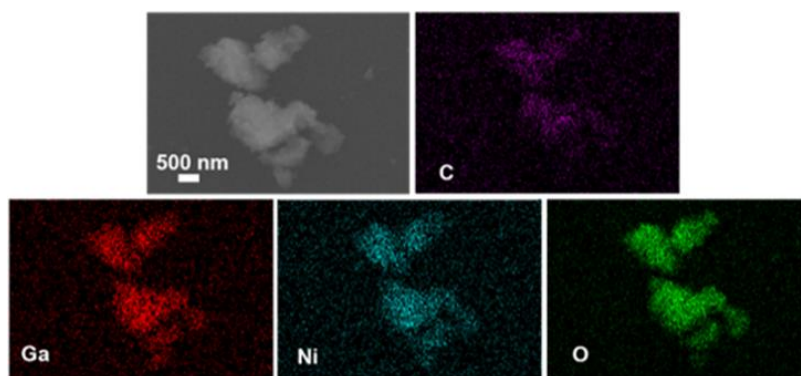

Fig. S1 Elemental mapping images of NiGa LDH.

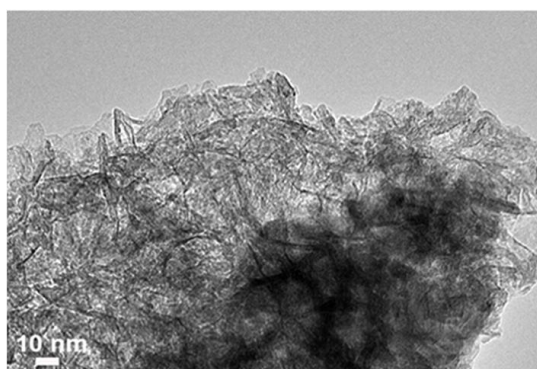

Fig. S2 The TEM image of NiGa LDH.

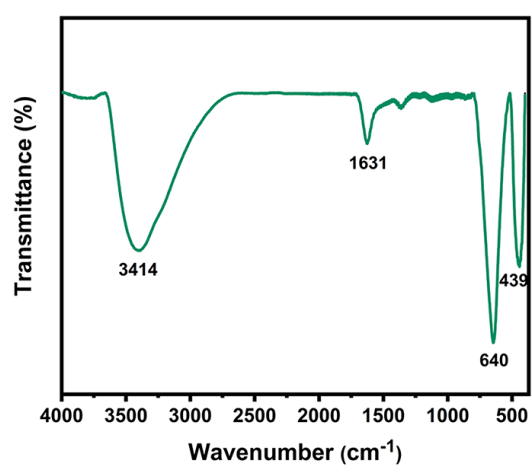

Fig. S3 The FTIR spectrum of NiGa<sub>2</sub>O<sub>4</sub>.

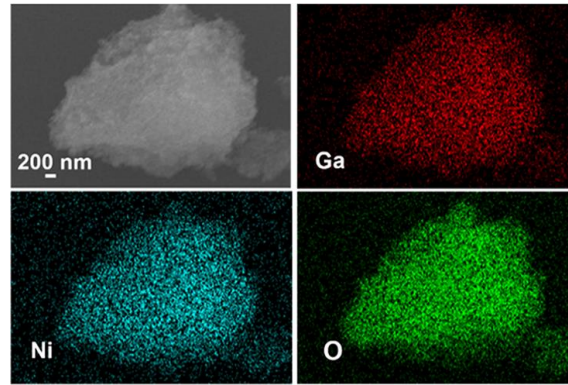

Fig. S4 SEM elemental mapping images of NiGa<sub>2</sub>O<sub>4</sub>.

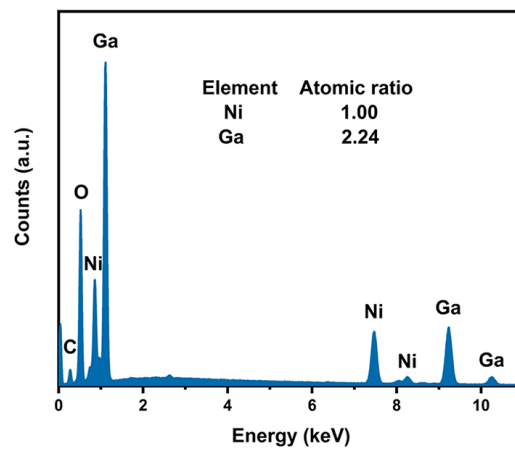

Fig. S5 The EDS spectrum of NiGa<sub>2</sub>O<sub>4</sub>.

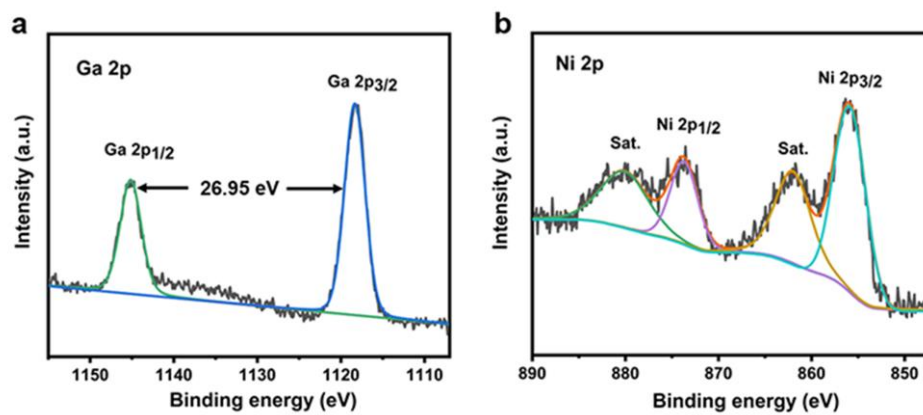

Fig. S6 XPS spectra of (a) Ga 2p and (b) Ni 2p for NiGa<sub>2</sub>O<sub>4</sub>.

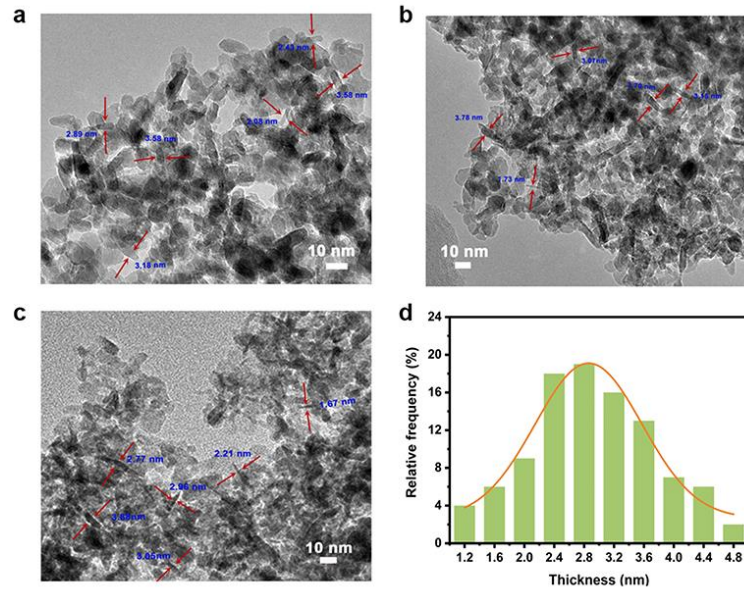

Fig. S7 (a-c) The TEM images and (d) the distribution of nanosheets thickness of NiGa<sub>2</sub>O<sub>4</sub>.

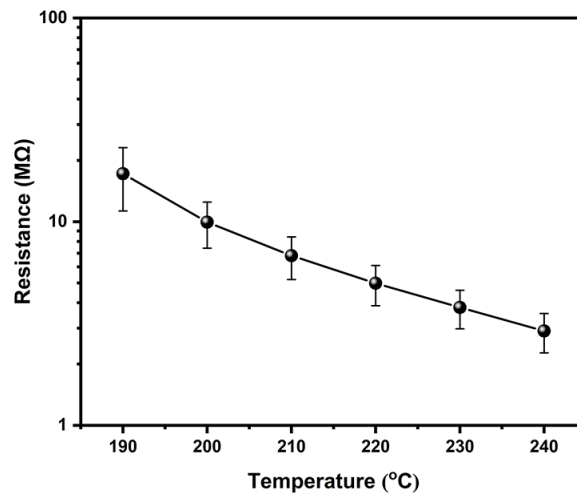

Fig. S8 The initial resistance in air for the sensor based on NiGa<sub>2</sub>O<sub>4</sub> nanosheets at different operating temperatures.

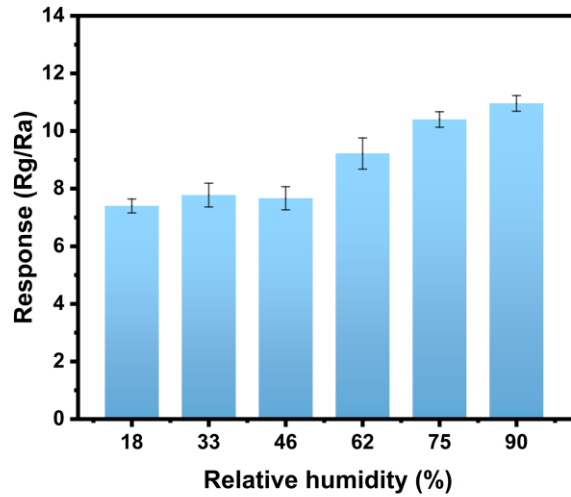

Fig. S9 The responses of sensor based on NiGa<sub>2</sub>O<sub>4</sub> nanosheets to 10 ppm xylene at different humidity (190°C).

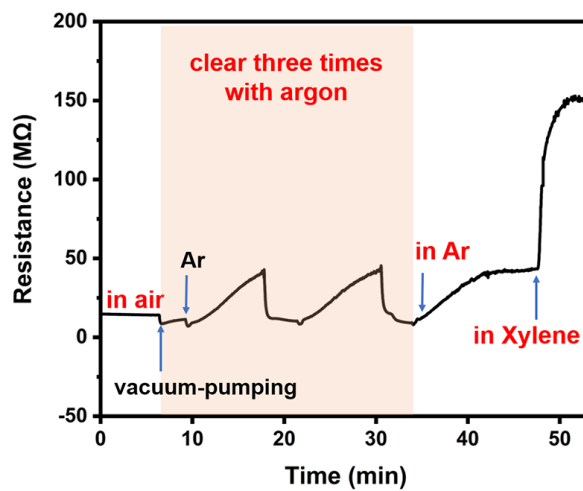

Fig. S10 The resistance changes of sensor based on NiGa<sub>2</sub>O<sub>4</sub> nanosheets during vacuum extraction and gas-sensing properties with Ar as background gas (a well-designed device).
